# Supplementary material
Source: PubMed Central journal article supplement (PMC3587221)
Supplement: 1217632110_pnas.201217632SI.pdf [file 1217632110_pnas.201217632SI.pdf]

# Supporting Information

Masri et al. 10.1073/pnas.1217632110

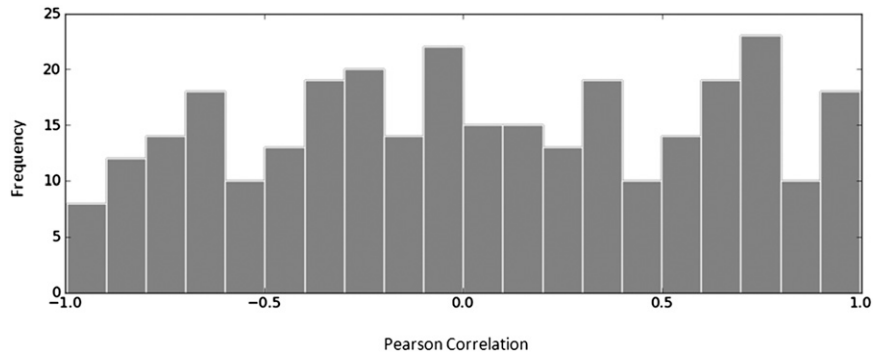

**Fig. S1.** Correlation between WT and *Clock*<sup>-/-</sup> acetylation profiles. Pearson's correlation was calculated for acetylation profiles comparing WT and *Clock*<sup>-/-</sup> livers. Correlation coefficients are shown in the histogram ranging from -1 (inversely correlated) to 1 (positively correlated). A correlation of 0 indicates no correlation in acetylation profiles.

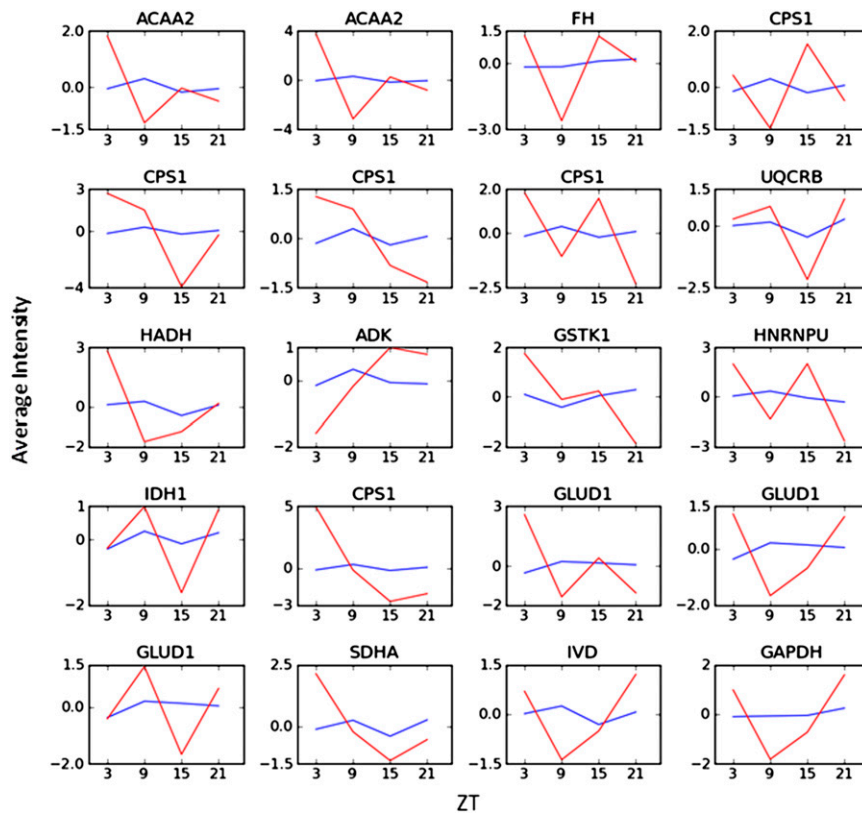

**Fig. S2.** Acetylated peptides versus unmodified peptide abundance. A graphical representation displays average intensity profiles of unmodified peptides versus acetylated peptide intensity, identified by MS from the same protein. Acetylation profiles are shown in red and unmodified peptide profiles are shown in blue. Data are shown over the four ZTs: 3, 9, 15, and 21.
